# Supplementary material for: Enhancing protein aggregation prediction: a unified analysis leveraging graph convolutional networks and active learning
Source: Royal Society of Chemistry journal article supplement (doi:10.1039/d4ra06285j), 2024-01-01
Supplement: d4ra06285j1.pdf [file d4ra06285j1.pdf]

## Supporting Information

### Enhancing Protein Aggregation Prediction: A Unified Analysis Leveraging Graph Convolutional Networks and Active Learning

Jiwon Sun<sup>1,†</sup>, JunHo Song<sup>1,†</sup>, Joo Kim<sup>1,†</sup>, Seungpyo Kang<sup>1</sup>, Eunyong Park<sup>2</sup>, Seungwoo Seo<sup>2,\*</sup>,  
and Kyoungmin Min<sup>1,\*</sup>

<sup>1</sup>School of Mechanical Engineering, Soongsil University, 369 Sangdo-ro, Dongjak-gu, Seoul  
06978, Republic of Korea

<sup>2</sup>AinB, 160 Yeoksam-ro, Gangnam-gu, Seoul 06249, Republic of Korea

<sup>†</sup>These authors contributed equally to this work.

\*Corresponding author: [seungwoo.seo@ainbsci.com](mailto:seungwoo.seo@ainbsci.com) (S. Seo), [kmin.min@ssu.ac.kr](mailto:kmin.min@ssu.ac.kr) (K. Min)

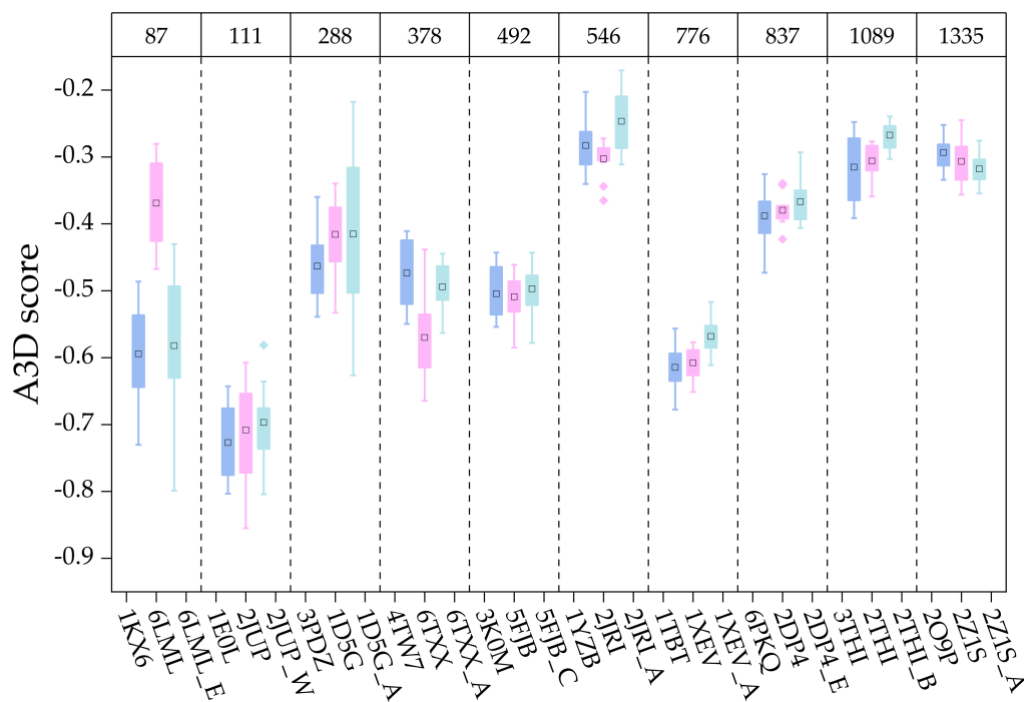

**Figure S1.** Represents the box plot of the A3D score of protein structures with the same AA sequence. Protein structures that have the same AA sequence were categorized by the AA sequence lengths represented at the top. The light blue box means the original single-polypeptide chains; the pink box means the single polypeptide chains within multi-polypeptide chains; and the cyan box means the single-polypeptide chains that were divided from the multi-polypeptide chains. The square box represents the average A3D score of 12 different protein structures in dynamic mode. The box in a box plot represents data covering around 75%, the portions marked with a rectangle signify outliers.

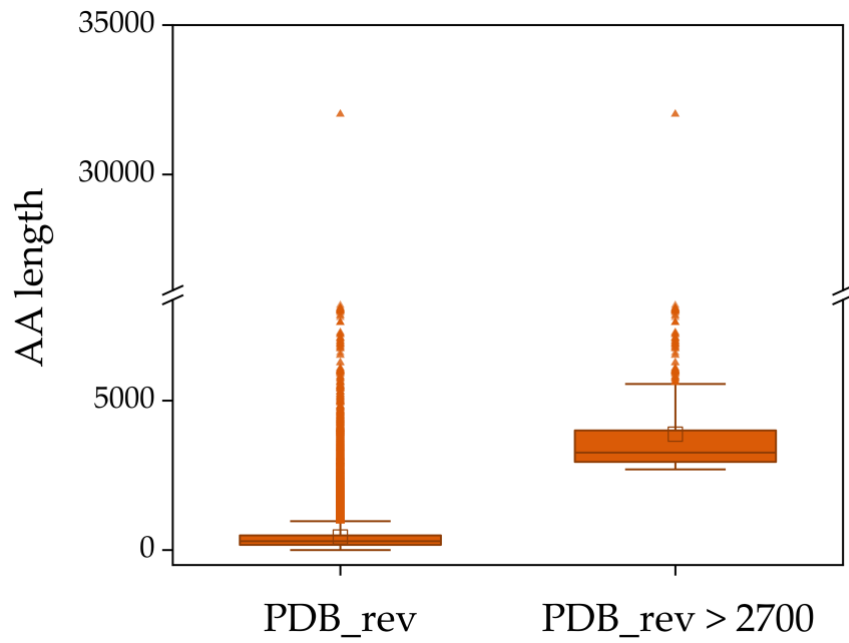

**Figure S2.** Represents box plot of AA length for PDB\_rev data and PDB\_rev data having over 2700 AA length. The box in a box plot represents data covering around 75%, the portions marked with triangles signify outliers, and the parts marked with squares indicate the average value.

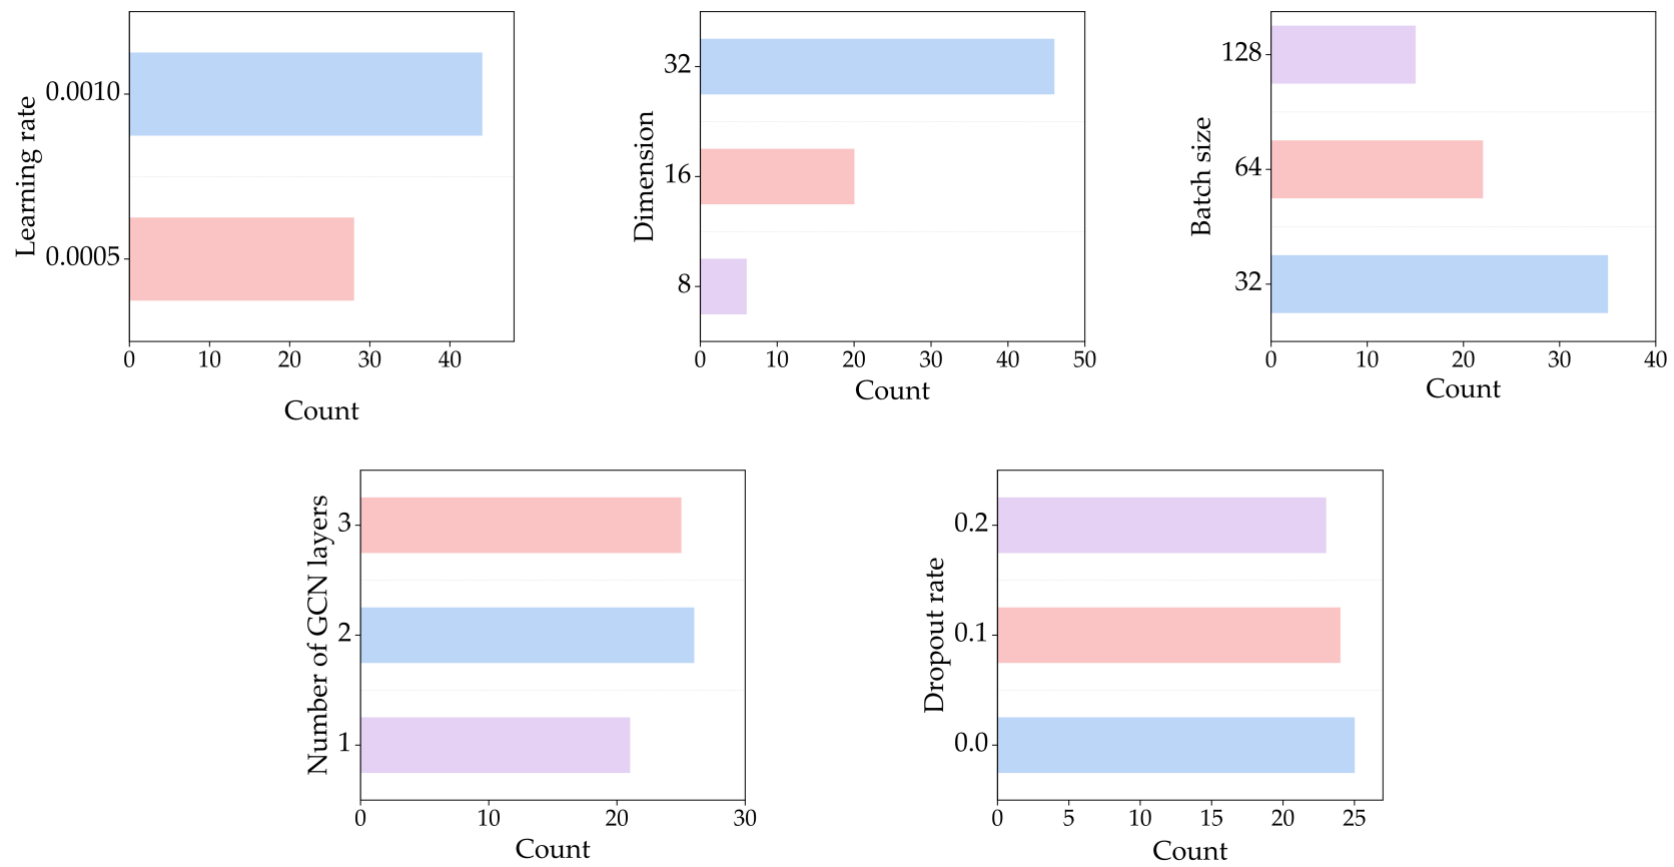

**Figure S3.** Distribution of hyperparameters in the top ten percent performing models: (a) learning rate, (b) dimension, (c) batch size, (d) number of GCN layers, and (e) dropout rate.

(a)

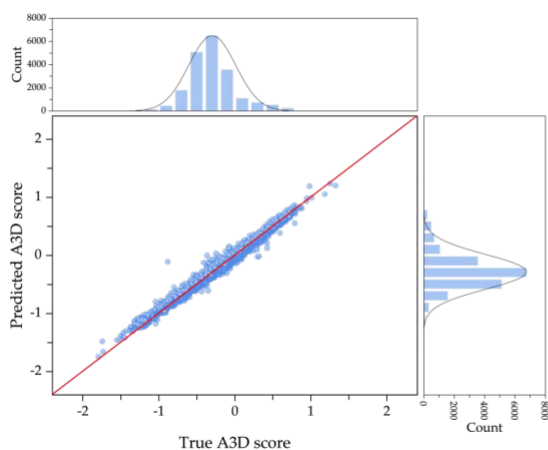

|                    | R <sup>2</sup> | MAE    |
|--------------------|----------------|--------|
| Average            | 0.9820         | 0.0350 |
| Standard deviation | 0.0031         | 0.0029 |
| Max                | 0.9849         | 0.0381 |
| Min                | 0.9742         | 0.0278 |

(b)

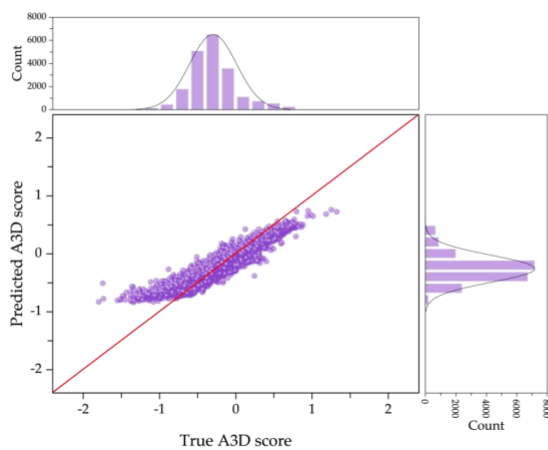

|                    | R <sup>2</sup> | MAE    |
|--------------------|----------------|--------|
| Average            | 0.8466         | 0.0786 |
| Standard deviation | 0.2190         | 0.0431 |
| Max                | 0.9645         | 0.2305 |
| Min                | 0.0110         | 0.0417 |

**Figure S4.** (Left) Comparison of predicted versus calculated A3D score value with GCN model, and (right) corresponding R<sup>2</sup> and MAE values and their statistical output (from 20 different prediction models from a randomly chosen training set) for (a) train size 80%, and (b) train size 0.1%, model.

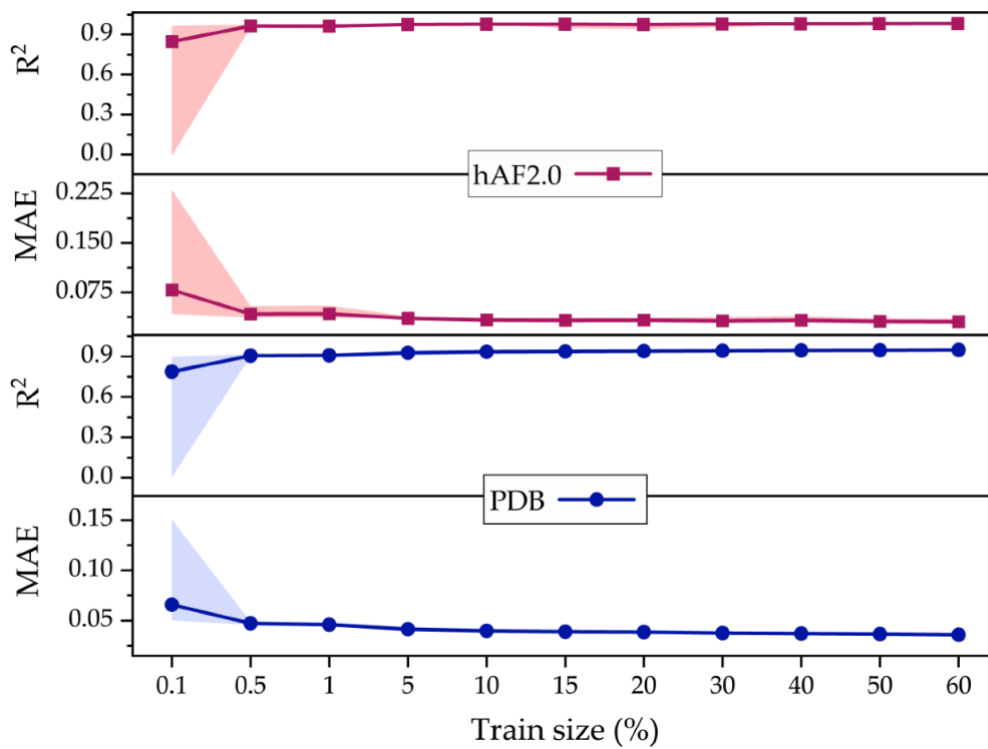

**Figure S5.** Performance visualization of MAE and R<sup>2</sup> with error range for each train size (0.1% to 60%) of PDB and hAF2.0.

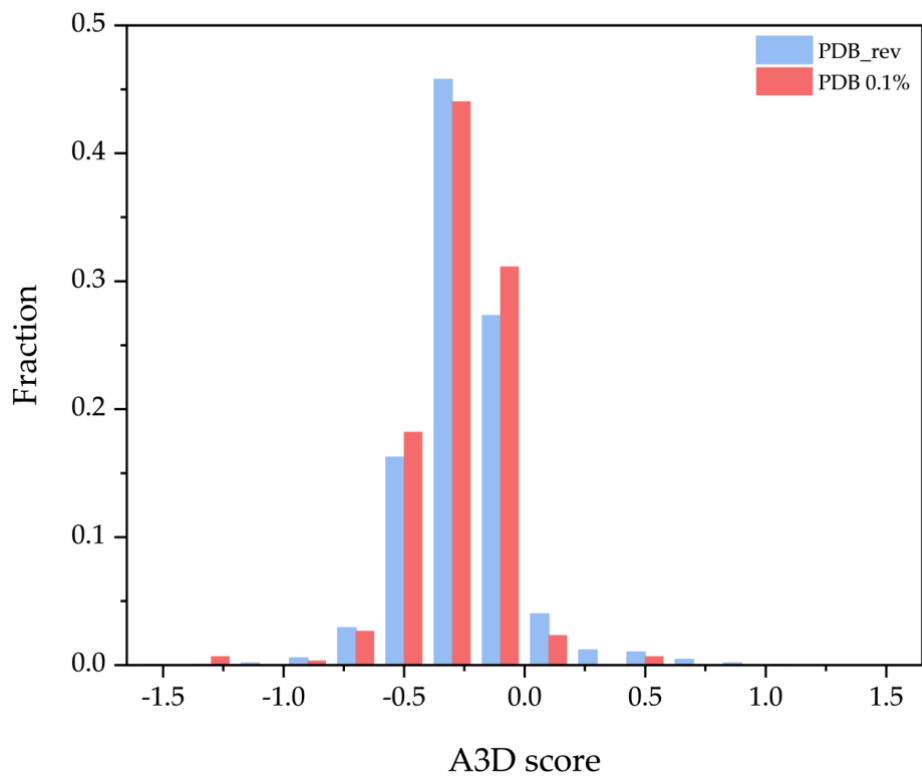

**Figure S6.** A3D score distribution from PDB\_rev and selected PDB for 0.1% datasets

| AA lengths | PDB    | Standard deviation | average A3D score |
|------------|--------|--------------------|-------------------|
| 87         | 1KX6   | 0.0715             | -0.5945           |
|            | 6LML   | 0.0643             | -0.3692           |
|            | 6LML_E | 0.1130             | -0.5820           |
| 111        | 1E0L   | 0.0548             | -0.7269           |
|            | 2JUP   | 0.0756             | -0.7083           |
|            | 2JUP_W | 0.0551             | -0.6970           |
| 288        | 3PDZ   | 0.0531             | -0.4634           |
|            | 1D5G   | 0.0546             | -0.4159           |
|            | 1D5G_A | 0.1185             | -0.4153           |
| 378        | 4TW7   | 0.0475             | -0.4735           |
|            | 6TXX   | 0.0594             | -0.5698           |
|            | 6TXX_A | 0.0355             | -0.4942           |
| 492        | 3K0M   | 0.0383             | -0.5046           |
|            | 5FJB   | 0.0350             | -0.5089           |
|            | 5FJB_C | 0.0359             | -0.4970           |
| 546        | 1YZB   | 0.0384             | -0.2830           |
|            | 2JRI   | 0.0252             | -0.3027           |
|            | 2JRI_A | 0.0456             | -0.2467           |
| 776        | 1TBT   | 0.0337             | -0.6144           |
|            | 1XEV   | 0.0229             | -0.6078           |
|            | 1XEV_A | 0.0251             | -0.5683           |
| 837        | 6PKQ   | 0.0393             | -0.3881           |
|            | 2DP4   | 0.0217             | -0.3797           |
|            | 2DP4_E | 0.0305             | -0.3668           |
| 1089       | 3THI   | 0.0469             | -0.3151           |
|            | 2THI   | 0.0263             | -0.3061           |
|            | 2THI_B | 0.0205             | -0.2675           |
| 1335       | 2O9P   | 0.0244             | -0.2936           |
|            | 2Z1S   | 0.0305             | -0.3067           |
|            | 2Z1S_A | 0.0215             | -0.3180           |

**Table S1.** Represents the average and standard deviation (std) of the A3D score that have the same Amino Acid (AA) sequences. The proteins sharing the same AA were categorized by the AA lengths as same as in **Figure S1**



| Model         | Inference time (sec) |
|---------------|----------------------|
| GCN           | 0.5                  |
| Aggrescan 3.0 | 21,240               |

**Table S2.** The inference time for randomly selected 30 different proteins. Both benchmarks were performed using a CPU core of Intel(R) Xeon(R) Gold 6240 @ 2.60 GHz. The GCN model utilized two RTX 3090 24GB GPUs, while the Aggrescan 3.0 used only the CPU.
